# Supplementary material for: Pyrene–neomycin conjugate: dual recognition of a DNA triple helixElectronic supplementary information (ESI) available: NMR spectra, UV spectra, extinction coefficients, melting curves of pyrene–neomycin conjugate, details of modeling studies. See http://www.rsc.org/suppdata/cc/b1/b108171c/
Source: Royal Society of Chemistry journal article supplement (doi:10.1039/b108171c), 2001-12-05
Supplement: b108171c.doc [file b108171c.doc]

# *SUPPORTING INFORMATION:*

## Materials:

*Nucleic Acids.* DNA polymers were purchased from Pharmacia Biotech, Inc. (Piscataway, NJ) and were used without further purification. DNA used include poly(dA), lot number: 9017836021; poly(dT), lot numbers: 8107834021 and 9107834021; poly(dA)(dT): lot number: 9067860021; Poly(rA): lot number: 7104110011, Poly(rU): lot number: 9034440021;. The concentrations of all the polymer solutions were determined spectrophotometrically using the following extinction coefficients (in units of mol of nucleotide/L)-1 cm-1= 8900 for poly(dA), = 9000 for poly(dT), = 6000 for poly(dA)•poly(dT), ),   = 9800 for poly(rA),  = 9350 for poly(rU)..

*Chemicals:* Neomycin B, 1-pyrenebutyric acid N-hydroxysuccinimide ester, 2,4,6-Triisopropylbenzenesulfonyl chloride, Di-tert-butyl dicarbonate, 2-aminoethanethiol hydrochloride, 4-dimethyl-aminopyridine and 1-aminopyrene were purchased from Acros (New Jersey) and were used without further purification. 4M HCl/disoxane was purchased from Aldrich and was used without further purification. Methylene chloride, DMF, dioxane were used as received. Pyridine was purified by CaH2 with distillation before using.

### Figure S1. Synthesis of Pyrene-Neomycin

***Pyrene-neomycin Synthesis -Experimental***

Compound 1a-1c have previously been reported (Kirk, S. R., Luedtke, N. W., Tor, Y., J. Am. Chem. Soc., 2000, 122, 980-981).

*Compound 1d.* Compound 1c (70mg, 0.055mmol) and 4-dimethyl-aminopyridine (1mg) were dissolved in 5ml anhydrous methylene chloride at room temperature. 1-pyrenebutyric acid N-hydroxysuccinimide ester (64mg, 0.165mmol, 3 equiv.) was added into the solution. The reaction mixture was kept stirring overnight. Organic solvent was then removed by vacuum. Flash column chromatography (5% CH3OH in CH2Cl2) afforded the desired product as a white solid. (62mg, 73%). Rf 0.48 (10% CH3OH in CH2Cl2); 1HNMR (500MHz, methanol-d4, 25C): 7.9-8.3 (m, 9H, Acr), 5.48 (br, 1H), 5.37 (1H), 5.13 (1H), 4.92 (1H), 4.23 (1H), 4.09(2H), 3.89 (2H), 3.76 (2H), 3.44-3.56 (6H), 3.0-3.3 (9H), 2.86 (2H), 2.7 (4H), 2.38 (2H), 2.18 (2H), 1.94 (1H), 1.4 (m, 54H).

*Compound 1e.* Compound 1d (10mg) was dissolved in dioxane (0.6ml, treated over alumina). 1, 2-ethanedithiol (0.002 ml) was added followed by 4M HCl/dioxane (0.6ml). The solution was swirled for 5 min by hand upon which a pale yellow precipitate formed. Further precipitation was induced by adding ether and hexane (0.6ml each). Precipitate was recovered by centrifugation and several washes with ether and hexane. The pale-yellow solid was redissolved in water and lyophilized overnight (6mg, 80% yield). max =342nm; 342 = 16778 cm-1M-1 HRMS (MALDI) m/z [M+2H]+ 946, calcd for C45H66N7O13S 944.

1H NMR of 1a in CD3OD

1H NMR of 1b in CDCl3

1H NMR of 1c in CD3OD

1H NMR of 1d in CD3OD

1H NMR of 1e in D2O


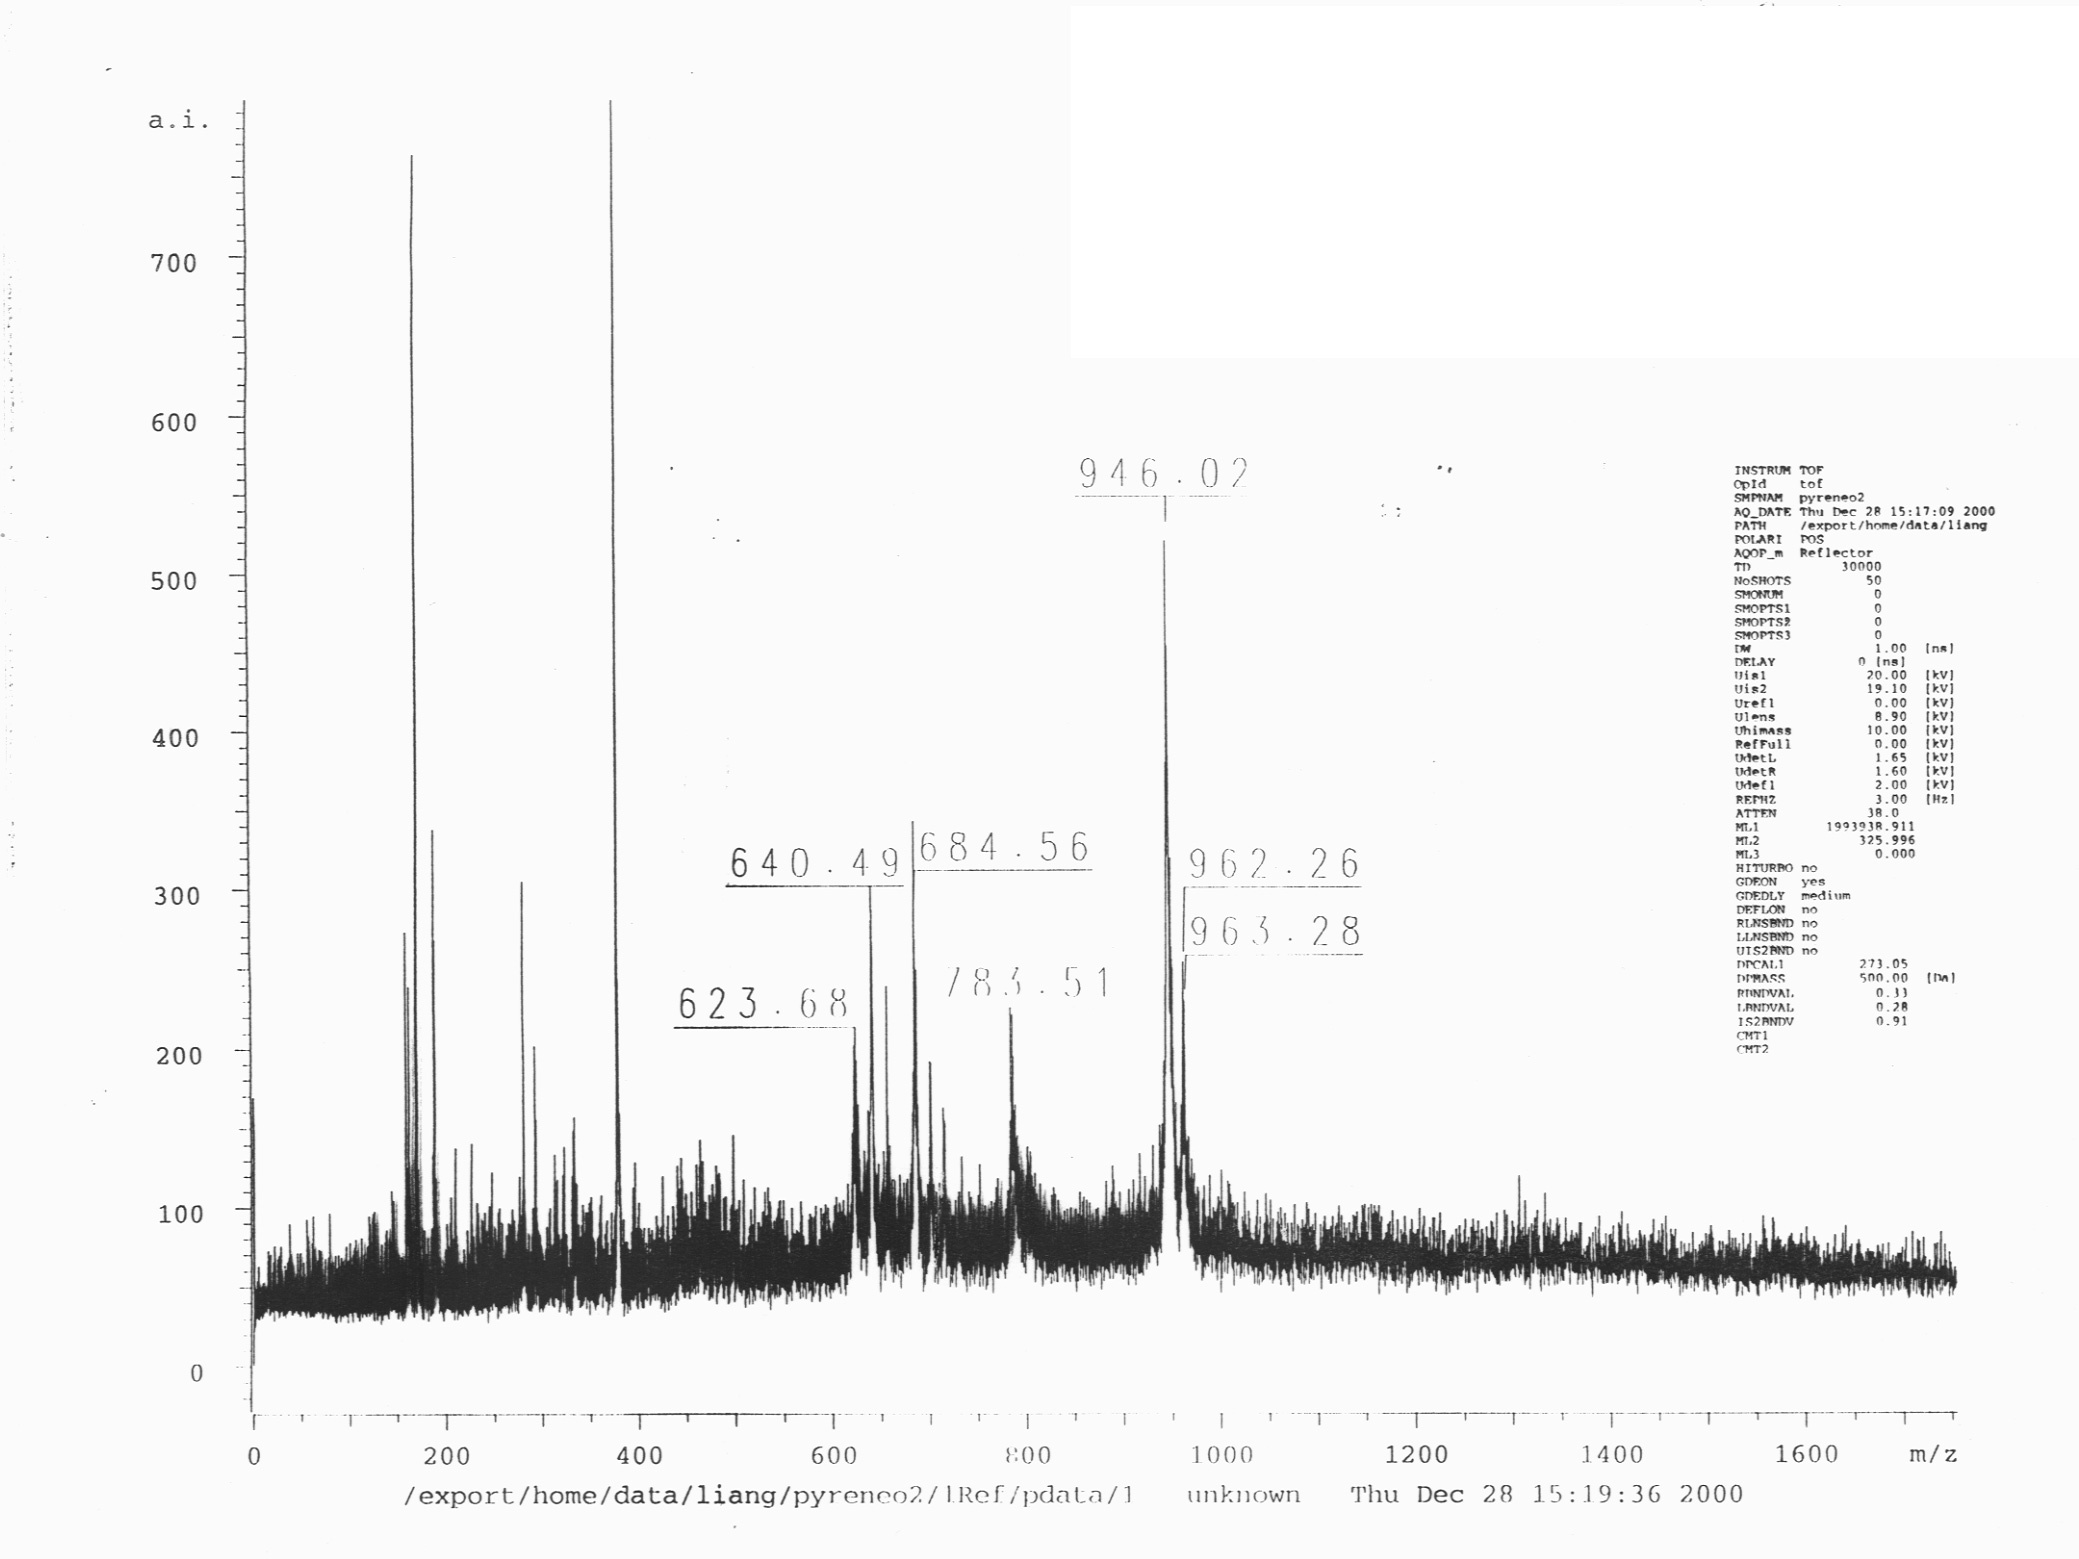


MS (MALDI) Spectrum of 1e

UV spectrum of Pyrene-neomycin

264 = 10956 cm-1M-1; 275 = 19152 cm-1M-1;

326 = 10663 cm-1M-1; 342 = 16778 cm-1M-1.

*Melting Curves*

| UV melting profiles of the poly(dA)2poly(dT) in the presence of 150mM KCl at the indicated ligand concentrations. [DNA]=15M base triplet. Solution conditions: 10 mM sodium cacodylate buffer, 0.5 mM EDTA, pH 7.2. Samples were heated from 20 to 90C at 5 deg/min, the annealing(90-5C) and the melting (5-90C) were conducted at 0.2 deg/min, and the samples were brought back to 20C at a rate of 5 deg/min. | |
| --- | --- |
|  |  |
|  |  |
|  |  |
|  |  |

| UV melting profiles of the poly(dA)2poly(dT) in the presence of 150mM KCl at the indicated ligand concentrations. [DNA]=15M base triplet. Solution conditions: 10 mM sodium cacodylate buffer, 0.5 mM EDTA, pH 7.2. Samples were heated from 20 to 90C at 5 deg/min, the annealing(90-5C) and the melting (5-90C) were conducted at 0.2 deg/min, and the samples were brought back to 20C at a rate of 5 deg/min. | |
| --- | --- |
|  |  |
|  |  |
|  |  |

| UV melting profiles of the poly(dA)2poly(dT) in the presence of 150mM KCl at the indicated ligand concentrations. [DNA]=15M base triplet. Solution conditions: 10 mM sodium cacodylate buffer, 0.5 mM EDTA, pH 7.2. Samples were heated from 20 to 90C at 5 deg/min, the annealing(90-5C) and the melting (5-90C) were conducted at 0.2 deg/min, and the samples were brought back to 20C at a rate of 5 deg/min. | |
| --- | --- |
|  |  |
|  |  |
|  |  |
| UV melting profiles of the poly(dA)2poly(dT) in the presence of 150mM KCl at the indicated ligand concentrations. [DNA]=15M base triplet. Solution conditions: 10 mM sodium cacodylate buffer, 0.5 mM EDTA, pH 7.2. Samples were heated from 20 to 90C at 5 deg/min, the annealing(90-5C) and the melting (5-90C, curves shown below) were conducted at 0.2 deg/min, and the samples were brought back to 20C at a rate of 5 deg/min. | |
|  |  |
|  |  |
|  |  |

| UV melting profiles (287nm) of the poly(rA)poly(rU) and poly(rA)2poly(rU) in the presence of 35mM NaCl at the indicated ligand concentrations. [RNA]=30M base triplet. Solution conditions: 10 mM sodium cacodylate buffer, 0.1 mM EDTA, pH 6.8. Samples were heated from 20 to 90C at 0.2 deg/min. | |
| --- | --- |
|  |  |
|  |  |
|  |  |
|  |  |

| UV melting profiles (280nm) of the poly(rA)poly(rU) and poly(rA)2poly(rU) in the presence of 35mM NaCl at the indicated ligand concentrations. [RNA]=30M base triplet. Solution conditions: 10 mM sodium cacodylate buffer, 0.1 mM EDTA, pH 6.8. Samples were heated from 20 to 90C at 0.2 deg/min. | |
| --- | --- |
|  |  |
|  |  |
|  |  |
|  |  |

| UV melting profiles (284nm) of the poly(rA)poly(rU) and poly(rA)2poly(rU) in the presence of 35mM NaCl at the indicated ligand concentrations. [RNA]=30M base triplet. Solution conditions: 10 mM sodium cacodylate buffer, 0.1 mM EDTA, pH 6.8. Samples were heated from 20 to 90C at 0.2 deg/min. | |
| --- | --- |
|  |  |
|  |  |
|  |  |
|  |  |

| UV melting profiles (280nm) of the poly(rA)poly(rU) and poly(rA)2poly(rU) in the presence of 35mM NaCl at the indicated ligand concentrations. [RNA]=30M base triplet. Solution conditions: 10 mM sodium cacodylate buffer, 0.1 mM EDTA, pH 6.8. Samples were heated from 20 to 90C at 0.2 deg/min. | |
| --- | --- |
|  |  |
|  |  |
|  |  |
|  |  |

| UV melting profiles (284nm) of the poly(rA)poly(rU) and poly(rA)2poly(rU) in the presence of 35mM NaCl at the indicated ligand concentrations. [RNA]=30M base triplet. Solution conditions: 10 mM sodium cacodylate buffer, 0.1 mM EDTA, pH 6.8. Samples were heated from 20 to 90C at 0.2 deg/min. | |
| --- | --- |
|  |  |
|  |  |
|  |  |
|  |  |

| UV melting profiles (287nm) of the poly(rA)poly(rU) and poly(rA)2poly(rU) in the presence of 35mM NaCl at the indicated ligand concentrations. [RNA]=30M base triplet. Solution conditions: 10 mM sodium cacodylate buffer, 0.1 mM EDTA, pH 6.8. Samples were heated from 20 to 90C at 0.2 deg/min. | |
| --- | --- |
|  |  |
|  |  |
|  |  |
|  |  |

| UV melting profiles (280nm) of the poly(rA), poly(rU) and poly(rA)2poly(rU) in the presence of 35mM NaCl at the indicated ligand concentrations. [RNA]=30M base triplet. Solution conditions: 10 mM sodium cacodylate buffer, 0.1 mM EDTA, pH 6.8. Samples were heated from 20 to 90C at 0.2 deg/min. | |
| --- | --- |
|  |  |
|  |  |
|  |  |
|  |  |

| UV melting profiles (284 nm) of the poly(rA), poly(rU) and poly(rA)2poly(rU) in the presence of 35mM NaCl at the indicated ligand concentrations. [RNA]=30M base triplet. Solution conditions: 10 mM sodium cacodylate buffer, 0.1 mM EDTA, pH 6.8. Samples were heated from 20 to 90C at 0.2 deg/. | |
| --- | --- |
|  |  |
|  |  |
|  |  |
|  |  |

| UV melting profiles (287 nm)of the poly(rA), poly(rU) and poly(rA)2poly(rU) in the presence of 35mM NaCl at the indicated ligand concentrations. [RNA]=30M base triplet. Solution conditions: 10 mM sodium cacodylate buffer, 0.1 mM EDTA, pH 6.8. Samples were heated from 20 to 90C at 0.2 deg/min and the samples were brought back to 5C at a rate of 5 deg/min. | |
| --- | --- |
|  |  |
|  |  |
|  |  |
|  |  |

*Computer Modeling*

Step I: DNA (TAT) triplex conformation

The original structure of dT10dA10dT10 triplex was obtained from the NMR structure reported by Feigon (*Biochemistry* **1998**). 27 sodium ions were added to neutralize the structure. The conformation was then optimized by AMPER* force field, in water, to within a gradient of 0.5 kJ/molÅ. The movements of the atoms of the external bases were restricted during minimization.

Step II: Neomycin conformation

Neomycin structure was built and optimized with MacroModel and SYBYL programs using AMBER* force field. The all atom AMBER* force field has been used since it contains parameters for both neomycin and the DNA triplex. In accordance with NMR experiments, five of the six-neomycin amines were protonated. Conformational searching was done with Monte Carlo routine from MacroModel, using all atom AMBER* force field, the force field charges, and the continuum GB/SA model of water as implemented in MacroModel. All the flexible bonds were selected.


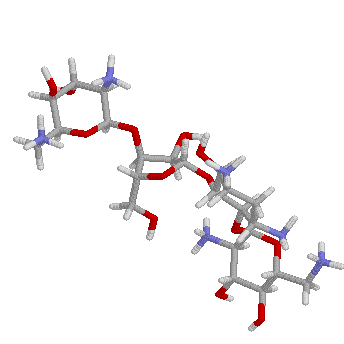


Conformation of neomycin bound to W-H groove.

Step III Pyrene-neomycin conformation

Pyrene-neomycin conformation was generated based on neomycin conformation. The generated conformation was then optimized by AMPER* force field and water as a solvent.

Step IV Docking

After optimizing the pyrene-neomycin conformation, the structure was docked into Waston-Hoogsteen groove of TAT triplex in different orientations. Restricting the movement of the triplex, the structure of the complex was optimized using AMBER* force field and water as a solvent.
